# Supplementary material for: Electrical switching of high-performance bioinspired nanocellulose nanocomposites
Source: PubMed Central journal article supplement (PMC7910463; doi:10.1038/s41467-021-21599-1), 2021-02-26
Supplement: 41467_2021_21599_MOESM3_ESM.pdf [file 41467_2021_21599_MOESM3_ESM.pdf]

## **Description of Additional Supplementary Files**

File Name: Supplementary Movie 1

Description: Electricity-Adaptive Mechanical Patterns

File Name: Supplementary Movie 2

Description: Reconfiguration of Mechanical Patterns
